# Supplementary figures and images for: Melatonin Treatment of Apricot Trees Leads to Maintenance of Fruit Quality Attributes during Storage at Chilling and Non-Chilling Temperatures
Source: MDPI journal article supplement (doi:10.3390/agronomy11050917), 2021-05-07

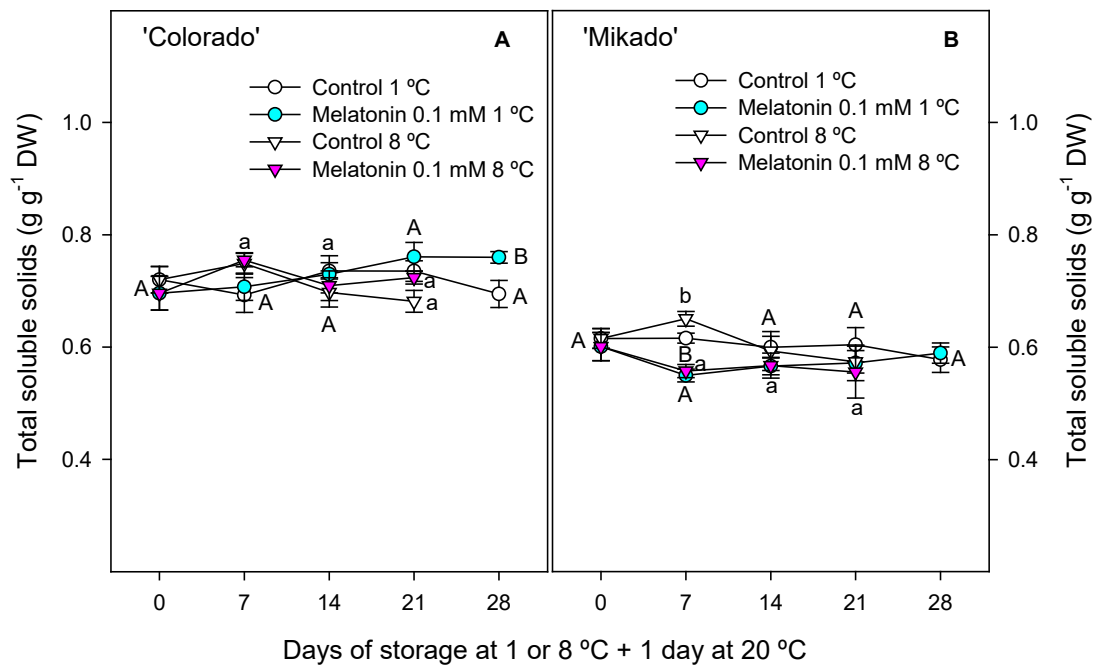

Figure S1

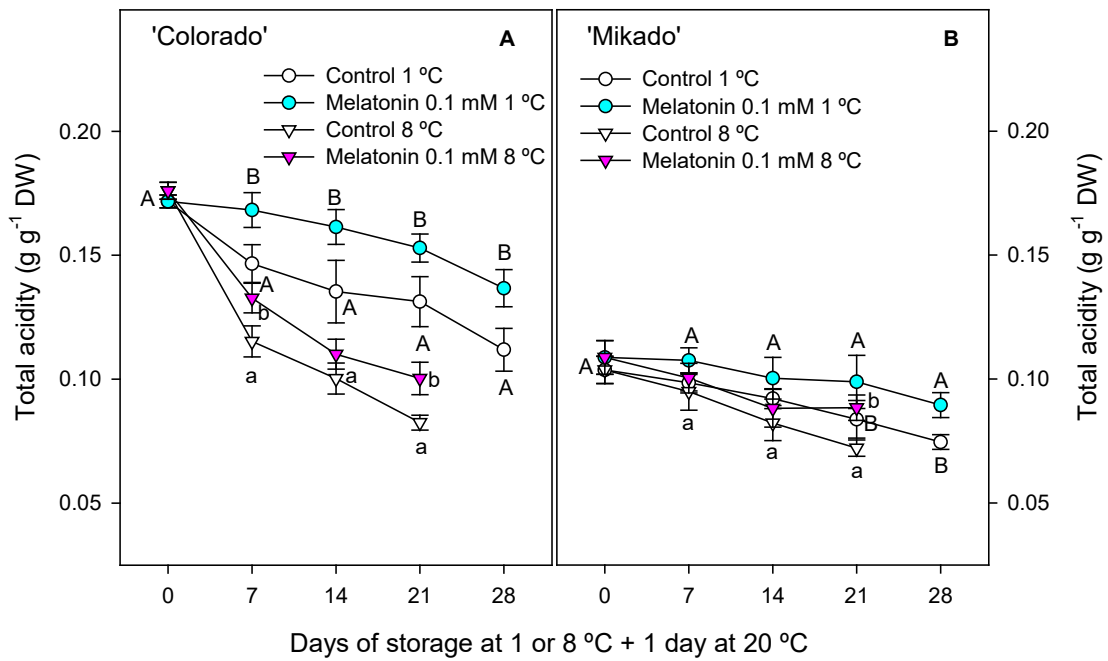

Figure S2

Supplement: s1 [file s1]
